# Supplementary material for: Expression of human BRCA1 variants in mouse ES cells allows functional analysis of BRCA1 mutations
Source: JCI journal article supplement (doi:10.1172/jci39836), 2009-09-17
Supplement: sd1 [file 1]

301 Moved Permanently

# Moved Permanently

The document has moved here.
